# Supplementary material
Source: Springer Nature journal article supplement (https://www.springermedizin.de/resource/supplementary/12955_2009_656_MOESM3_ESM.pdf/9561016)

# SDS-Scores of SF-36 results evaluating first stroke VFD-patients compared to healthy controls

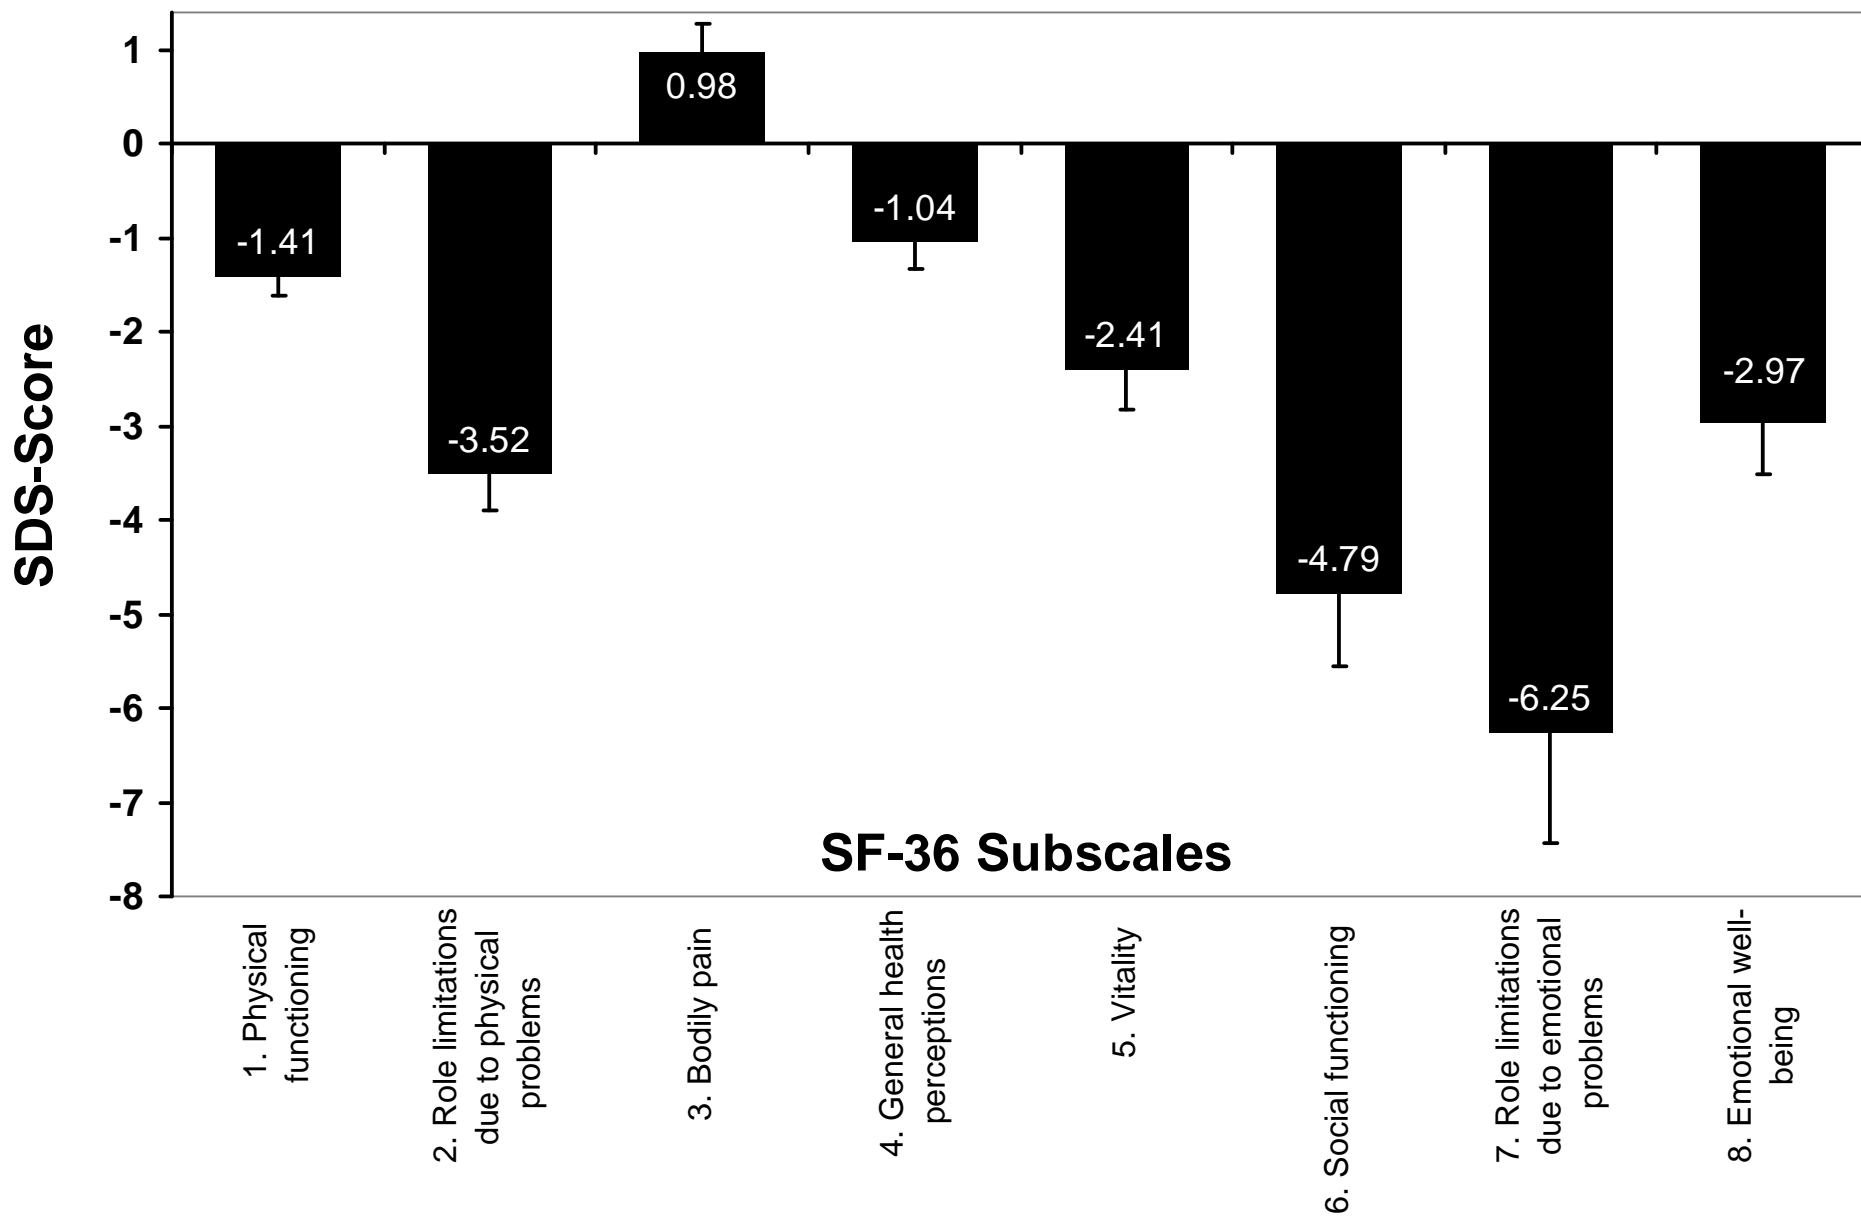

Supplement: MOESM3 [file 9561016]
